# Supplementary material for: Systems Modeling of Interactions between Mucosal Immunity and the Gut Microbiome during Clostridium difficile Infection
Source: PLoS One. 2015 Jul 31;10(7):e0134849. doi: 10.1371/journal.pone.0134849 (PMC4521955; doi:10.1371/journal.pone.0134849)
Supplement: S1 Table — Table contains the calibrated parameter values of the model which were generated through Particle Swarm and Genetic algorithms parameter estimation methods in combination with experimentally obtained data. (XLSX) [file pone.0134849.s003.xlsx]

## Sheet: parameterfile
Reaction	Subscript	Parameter Name	Value	Units	Coefficient of Variation	Description
Cdiff Death	Cd
		d	6.27092e-10	1/(#*d)	3.91	KSA rate constant
		γ	594.897	1	366.16	Modifier of N_Lum activator
		α	0.102703	1	3.47	Modifier of Commensal_Harmful inhibitor
Cdiff Growth	CG
		K	5e-11	1/d	1.4	KSA rate constant
Commensal Death	CoD
		K	0.0933277	1/d	117.96	Mass action rate constant
Commensal Harmful Death	CHD
		S	828984387500	#/d	3.5	Maximum velocity
		H	45	1	3.46	Approximate equilibrium constant
Commensal Regrowth	CR
		K1	4.5e-10	1/d	19.68	KSA rate constant
		K2	0.156287	1/d	10.87	KSA rate constant
E Damage	Ed
		d	1.59921e-06	1/(#*d)	57.02	KSA rate constant
		γ1	1.1e-05	1	4309.73	Modifier of Th1_LP activator
		γ2	2.33813e-06	1	3244.46	Modifier of Th17_LP activator
		γ3	62.5912	1	42.79	Modifier of M_LP activator
E_i Damage	Eid
		d	0.065	1/(#*d)	11.72	KSA rate constant
		γ1	0.006	1	12.64	Modifier of Th1_LP activator
		γ2	0.0106698	1	111.78	Modifier of Th17_LP activator
		γ3	1.16013e-06	1	6203.13	Modifier of M_LP activator
E_i Natural Death	EN
		d	2.5	1/d	10.08	Mass action rate constant
E Heal	EH
		K	4000	1/d	27.65	Mass action rate constant
E Inflame	EI
		K	0.00017108	1/(#*d)	5.97	KSA rate constant
eDC Degradation	eDC
		d	1.72495e-05	1/d	3270.45	Mass action rate constant
eDC Migration	eDC
		σ	10.5	1/d	483.41	Mass action rate constant
eDC Production	eDC
		K	0.55	1/d	2.95	Mass action rate constant
tDC Degradation	tDC
		d	0.00095	1/d	4240.53	Mass action rate constant
tDC Migration	tDC
		σ	3.65	1/d	491.99	Mass action rate constant
tDC Production	tDC
		K	0.0002	1/d	5.41	KSA rate constant
		γ1	559.297	1	37.34	Modifier of Commensal_Beneficial:Commensal_Dead ratio
		γ2	26.8747	1	3.84	Modifier of E:E_i ratio
		β	100	#	8.92	Half maximal denominator term
M Activation	MA
		K	4.5e-05	1/(#*d)	26.21	KSA rate constant
		γ	2	1	113.16	Modifier of Th17_LP and Cdiff activators
		α	0.0923086	1	723.07	Modifier of iTreg_LP inhibitor
M Death	M
		d	20	1/(#*d)	29.52	KSA rate constant
N Activation/Migration	NAM
		K	5.29828e-05	1/(#*d)	12.66	KSA rate constant
		γ1	0.120935	1/#	47.58	Modifier of E_d activator
		γ2	0.171191	1/#	35.85	Modifier of Th17_LP activator
		α	0.129717	1/#	3255.81	Modifier of iTreg_LP inhibitor
N Degradation	N
		d	2.35933e-07	1/(#*d)	12.54	KSA rate constant
Th1 Degradation	T1
		d	0.995057	1/d	33.82	Mass action rate constant
Th1 Differentiation	T1
		K	0.0430096	1/(#*d)	1151.79	KSA rate constant
		αE	9.65568e-05	1/#	3162.52	Modifier of E inhibitor
		αC	0.0648416	1/#	1796.68	Modifier of Commensal_Beneficial inhibitor
Th1 Migration	T1
		σ	1.459	1/d	600.46	Mass action rate constant
Th17 Degradation	T17
		d	2.39665	1/d	29.85	Mass action rate constant
Th17 Differentiation	T17
		K	2255.8	1/d	101.371	Mass action rate constant
Th17 Migration	T17
		σ	2.50454	1/d	115.67	Mass action rate constant
Th17 Plasticity	TP
		μ1	1.27393	1/d	767.45	Mass action rate constant
		μ2	0.00204015	1/(#*d)	379.36	Mass action rate constant
Treg Degradation	Tr
		d	0.506989	1/d	992.91	Mass action rate constant
Treg Differentiation	Tr
		K	53.9131	1/d	841.6	Mass action rate constant
Treg Migration	Tr
		σ	5.5	1/d	779.244	Mass action rate constant
